# Supplementary material for: Effect of the Freeze-Thaw on the Suspension Stability and Thermal Conductivity of EG/Water-Based Al2O3Nanofluids
Source: Hindawi journal article supplement (doi:10.1155/2019/2076341), 2019-02-12
Supplement: f1 [file 2076341.f1.xlsx]

## Sheet: Sheet1
	Figure 4. Validation results of Transient Hot Wire System
	Measured by Transient Hot Wire System				Reference data
	DI-water				DI-water
	Temperature [℃]	Thermal conductivity [W/mK]	Uncertainty [W/mK]		Temperature [℃]	Thermal conductivity [W/mK]
	10	0.58667	0.00587		10	0.58712
	20	0.603	0.00603		15	0.59512
	30	0.61844	0.00618		20	0.60312
	40	0.63178	0.00632		25	0.61048
	50	0.6399	0.0064		30	0.61748
	60	0.65333	0.00653		35	0.62512
	70	0.665	0.00665		40	0.63184
					45	0.63784
	EG+Water				50	0.6432
	Temperature [℃]	Thermal conductivity [W/mK]	Uncertainty [W/mK]		55	0.6482
	-10	0.36884	0.00369		60	0.65384
	0	0.37684	0.00377		65	0.65856
	10	0.38308	0.00383		70	0.66512
	20	0.39225	0.00392		75	0.668
	30	0.40107	0.00401		80	0.66992
	40	0.40646	0.00406
	50	0.4148	0.00415
	60	0.42283	0.00423		Ethylene Glycol
	70	0.42635	0.00426		Temperature [℃]	Thermal conductivity [W/mK]
					-8.94	0.244
	Ethylene Glycol				24.62	0.2476
	Temperature [℃]	Thermal conductivity [W/mK]	Uncertainty [W/mK]		64.76	0.2522
	-9.7	0.24312	0.00243		99.64	0.2555
	-0.2	0.24416	0.00244
	10.1	0.24546	0.00245
	20	0.24698	0.00247
	30.2	0.24834	0.00248
	40	0.24976	0.0025
	49.9	0.25139	0.00251
	59.9	0.25227	0.00252
	69.2	0.25324	0.00253
