# Supplementary material for: Effect of the Freeze-Thaw on the Suspension Stability and Thermal Conductivity of EG/Water-Based Al2O3Nanofluids
Source: Hindawi journal article supplement (doi:10.1155/2019/2076341), 2019-02-12
Supplement: f2 [file 2076341.f2.xlsx]

## Sheet: Sheet1
Figure 5. Transmittance of two types of EG/water-based Al2O3 nanofluids
	Measured by Turbiscan
	Without freeze-thaw			With freeze-thaw
	Height [µm]	Transmittance[%]		Height [µm]	Transmittance[%]
	40	0.09357		40	0.09283
	80	0.0966		80	0.09807
	120	0.1053		120	0.103
	160	0.11578		160	0.11368
	200	0.13401		200	0.12678
	240	0.16083		240	0.15423
	280	0.20956		280	0.19803
	320	0.30805		320	0.28059
	360	0.4891		360	0.43336
	400	0.77064		400	0.64229
	440	1.05071		440	0.86515
	480	1.28783		480	1.09294
	520	1.56475		520	1.37678
	560	1.86725		560	1.72506
	600	2.13087		600	2.01582
	640	2.39093		640	2.27598
	680	2.7149		680	2.60928
	720	3.04212		720	2.9452
	760	3.33361		760	3.23187
	800	3.49225		800	3.39271
	840	3.48848		840	3.40633
	880	3.44688		880	3.4035
	920	3.50314		920	3.4935
	960	3.66544		960	3.66314
	1000	3.8794		1000	3.86012
	1040	4.08036		1040	4.05951
	1080	4.22223		1080	4.21961
	1120	4.32544		1120	4.33665
	1160	4.39375		1160	4.39512
	1200	4.45296		1200	4.44782
	1240	4.51561		1240	4.48428
	1280	4.54055		1280	4.50534
	1320	4.5636		1320	4.50367
	1360	4.55773		1360	4.50545
	1400	4.54485		1400	4.49424
	1440	4.54904		1440	4.50409
	1480	4.54904		1480	4.52054
	1520	4.56203		1520	4.51394
	1560	4.55794		1560	4.48491
	1600	4.53332		1600	4.43671
	1640	4.50346		1640	4.42477
	1680	4.49445		1680	4.44918
	1720	4.50744		1720	4.43022
	1760	4.50891		1760	4.42068
	1800	4.5001		1800	4.41429
	1840	4.50576		1840	4.40413
	1880	4.49466		1880	4.3794
	1920	4.46668		1920	4.35499
	1960	4.44813		1960	4.34053
	2000	4.46647		2000	4.34503
	2040	4.49193		2040	4.35478
	2080	4.49969		2080	4.34996
	2120	4.46375		2120	4.33403
	2160	4.41723		2160	4.33969
	2200	4.39407		2200	4.30962
	2240	4.3771		2240	4.29704
	2280	4.35918		2280	4.29359
	2320	4.35268		2320	4.29809
	2360	4.35373		2360	4.29443
	2400	4.36892		2400	4.26739
	2440	4.36599		2440	4.23931
	2480	4.32523		2480	4.21364
	2520	4.29946		2520	4.20903
	2560	4.30606		2560	4.20746
	2600	4.33445		2600	4.20725
	2640	4.35415		2640	4.19887
	2680	4.36085		2680	4.20233
	2720	4.3729		2720	4.21878
	2760	4.39124		2760	4.22695
	2800	4.37573		2800	4.23365
	2840	4.33403		2840	4.21982
	2880	4.29076		2880	4.18692
	2920	4.25702		2920	4.18011
	2960	4.23282		2960	4.19237
	3000	4.22066		3000	4.19573
	3040	4.24057		3040	4.17414
	3080	4.26802		3080	4.15801
	3120	4.28426		3120	4.15339
	3160	4.30427		3160	4.14669
	3200	4.30155		3200	4.1425
	3240	4.27892		3240	4.13778
	3280	4.24979		3280	4.1228
	3320	4.23009		3320	4.10478
	3360	4.20536		3360	4.09116
	3400	4.16482		3400	4.08057
	3440	4.15465		3440	4.08152
	3480	4.16859		3480	4.0922
	3520	4.20138		3520	4.09964
	3560	4.23921		3560	4.09409
	3600	4.24047		3600	4.10436
	3640	4.24507		3640	4.12573
	3680	4.24529		3680	4.12552
	3720	4.23449		3720	4.10541
	3760	4.23187		3760	4.09577
	3800	4.22548		3800	4.10363
	3840	4.22349		3840	4.12385
	3880	4.2172		3880	4.14103
	3920	4.2236		3920	4.14711
	3960	4.22999		3960	4.14313
	4000	4.24518		4000	4.12259
	4040	4.25796		4040	4.11819
	4080	4.22307		4080	4.14019
	4120	4.20945		4120	4.17068
	4160	4.23827		4160	4.16335
	4200	4.1996		4200	4.16324
	4240	4.14669		4240	4.17362
	4280	4.14721		4280	4.17267
	4320	4.17917		4320	4.15381
	4360	4.22014		4360	4.13464
	4400	4.2565		4400	4.11578
	4440	4.27001		4440	4.11389
	4480	4.24424		4480	4.12856
	4520	4.21427		4520	4.14847
	4560	4.18546		4560	4.17068
	4600	4.17666		4600	4.17959
	4640	4.18954		4640	4.17026
	4680	4.23449		4680	4.15801
	4720	4.26729		4720	4.16073
	4760	4.26111		4760	4.15738
	4800	4.24445		4800	4.15465
	4840	4.23984		4840	4.16125
	4880	4.23889		4880	4.17246
	4920	4.23816		4920	4.17791
	4960	4.24392		4960	4.1798
	5000	4.25723		5000	4.14994
	5040	4.24958		5040	4.12689
	5080	4.21951		5080	4.12793
	5120	4.20348		5120	4.14208
	5160	4.19552		5160	4.13338
	5200	4.20055		5200	4.12008
	5240	4.21018		5240	4.11641
	5280	4.20956		5280	4.13443
	5320	4.20432		5320	4.15151
	5360	4.21417		5360	4.15863
	5400	4.24005		5400	4.17404
	5440	4.24937		5440	4.18189
	5480	4.23973		5480	4.17896
	5520	4.22391		5520	4.17728
	5560	4.25021		5560	4.18085
	5600	4.27483		5600	4.17791
	5640	4.28112		5640	4.17351
	5680	4.28961		5680	4.18399
	5720	4.29024		5720	4.18284
	5760	4.27221		5760	4.17487
	5800	4.2478		5800	4.15308
	5840	4.2346		5840	4.13652
	5880	4.228		5880	4.13768
	5920	4.23303		5920	4.1622
	5960	4.25513		5960	4.18189
	6000	4.27829		6000	4.1799
	6040	4.28259		6040	4.16607
	6080	4.29055		6080	4.15203
	6120	4.31182		6120	4.15318
	6160	4.30815		6160	4.16261
	6200	4.29631		6200	4.17791
	6240	4.2917		6240	4.18839
	6280	4.27672		6280	4.18902
	6320	4.24246		6320	4.18284
	6360	4.23271		6360	4.18378
	6400	4.27106		6400	4.193
	6440	4.29977		6440	4.1951
	6480	4.3091		6480	4.17844
	6520	4.34137		6520	4.15905
	6560	4.36934		6560	4.15266
	6600	4.36023		6600	4.15979
	6640	4.32722		6640	4.17404
	6680	4.29778		6680	4.18609
	6720	4.27756		6720	4.19258
	6760	4.26446		6760	4.19625
	6800	4.26226		6800	4.19457
	6840	4.28342		6840	4.19677
	6880	4.30972		6880	4.19101
	6920	4.30962		6920	4.20191
	6960	4.30396		6960	4.21113
	7000	4.26121		7000	4.22286
	7040	4.24036		7040	4.22318
	7080	4.25775		7080	4.19908
	7120	4.29369		7120	4.15434
	7160	4.31287		7160	4.12814
	7200	4.30668		7200	4.13076
	7240	4.2895		7240	4.14082
	7280	4.28657		7280	4.15476
	7320	4.28793		7320	4.15643
	7360	4.29443		7360	4.16775
	7400	4.3093		7400	4.16827
	7440	4.30993		7440	4.17467
	7480	4.29348		7480	4.1864
	7520	4.26771		7520	4.19405
	7560	4.24822		7560	4.19761
	7600	4.24371		7600	4.21102
	7640	4.26341		7640	4.22087
	7680	4.28248		7680	4.19468
	7720	4.30333		7720	4.15591
	7760	4.31308		7760	4.14711
	7800	4.31423		7800	4.15905
	7840	4.29652		7840	4.17215
	7880	4.27232		7880	4.15612
	7920	4.2697		7920	4.13537
	7960	4.28521		7960	4.14229
	8000	4.28321		8000	4.16073
	8040	4.26446		8040	4.18462
	8080	4.24308		8080	4.19876
	8120	4.23083		8120	4.19038
	8160	4.23722		8160	4.18284
	8200	4.25293		8200	4.17204
	8240	4.25891		8240	4.16859
	8280	4.27305		8280	4.17309
	8320	4.28206		8320	4.18179
	8360	4.28562		8360	4.17309
	8400	4.28646		8400	4.17142
	8440	4.26886		8440	4.18776
	8480	4.27043		8480	4.20474
	8520	4.27913		8520	4.20809
	8560	4.29348		8560	4.19782
	8600	4.2938		8600	4.1887
	8640	4.26991		8640	4.18598
	8680	4.25304		8680	4.20044
	8720	4.24413		8720	4.21574
	8760	4.25744		8760	4.21584
	8800	4.28227		8800	4.20977
	8840	4.29715		8840	4.20673
	8880	4.30847		8880	4.20306
	8920	4.33267		8920	4.2017
	8960	4.33529		8960	4.19049
	9000	4.2916		9000	4.18483
	9040	4.23544		9040	4.17938
	9080	4.19897		9080	4.17435
	9120	4.23648		9120	4.17414
	9160	4.27693		9160	4.1601
	9200	4.29306		9200	4.14501
	9240	4.30501		9240	4.13024
	9280	4.29956		9280	4.12573
	9320	4.28426		9320	4.12804
	9360	4.26299		9360	4.13359
	9400	4.24759		9400	4.15842
	9440	4.24665		9440	4.17456
	9480	4.22674		9480	4.19897
	9520	4.23135		9520	4.19216
	9560	4.23062		9560	4.17802
	9600	4.23994		9600	4.16974
	9640	4.2457		9640	4.15727
	9680	4.24832		9680	4.16031
	9720	4.23921		9720	4.18797
	9760	4.24047		9760	4.193
	9800	4.26205		9800	4.1887
	9840	4.28845		9840	4.1536
	9880	4.29065		9880	4.14365
	9920	4.28332		9920	4.14512
	9960	4.27735		9960	4.14176
	10000	4.26226		10000	4.13852
	10040	4.23282		10040	4.13453
	10080	4.23491		10080	4.1382
	10120	4.27368		10120	4.14784
	10160	4.29139		10160	4.15036
	10200	4.27619		10200	4.14072
	10240	4.26687		10240	4.14438
	10280	4.27358		10280	4.15476
	10320	4.26467		10320	4.16544
	10360	4.25513		10360	4.18106
	10400	4.26278		10400	4.1908
	10440	4.26718		10440	4.19258
	10480	4.27337		10480	4.18703
	10520	4.2676		10520	4.18609
	10560	4.25608		10560	4.18064
	10600	4.24707		10600	4.16597
	10640	4.24969		10640	4.16261
	10680	4.27064		10680	4.16544
	10720	4.30092		10720	4.17446
	10760	4.31653		10760	4.16806
	10800	4.31245		10800	4.14355
	10840	4.30281		10840	4.13432
	10880	4.29181		10880	4.13925
	10920	4.27599		10920	4.14784
	10960	4.2522		10960	4.14564
	11000	4.23596		11000	4.15214
	11040	4.22506		11040	4.15256
	11080	4.21689		11080	4.15119
	11120	4.23282		11120	4.14941
	11160	4.2501		11160	4.16649
	11200	4.26142		11200	4.16712
	11240	4.26425		11240	4.1448
	11280	4.26687		11280	4.13108
	11320	4.26907		11320	4.14051
	11360	4.26132		11360	4.15423
	11400	4.24361		11400	4.17079
	11440	4.22108		11440	4.18441
	11480	4.20715		11480	4.18326
	11520	4.19834		11520	4.17026
	11560	4.20275		11560	4.15067
	11600	4.20704		11600	4.13412
	11640	4.21982		11640	4.11347
	11680	4.2325		11680	4.11798
	11720	4.23722		11720	4.136
	11760	4.2565		11760	4.1492
	11800	4.25953		11800	4.14784
	11840	4.2435		11840	4.15507
	11880	4.22705		11880	4.15905
	11920	4.21385		11920	4.17131
	11960	4.2105		11960	4.18598
	12000	4.23051		12000	4.18493
	12040	4.25849		12040	4.15465
	12080	4.27054		12080	4.11735
	12120	4.27578		12120	4.11672
	12160	4.27515		12160	4.14344
	12200	4.27494		12200	4.16492
	12240	4.28699		12240	4.17613
	12280	4.26247		12280	4.19164
	12320	4.2237		12320	4.18944
	12360	4.20589		12360	4.16922
	12400	4.22003		12400	4.15538
	12440	4.24476		12440	4.14428
	12480	4.24853		12480	4.1535
	12520	4.23617		12520	4.15057
	12560	4.2303		12560	4.14606
	12600	4.24518		12600	4.14742
	12640	4.25849		12640	4.15245
	12680	4.27735		12680	4.16345
	12720	4.2763		12720	4.17917
	12760	4.25555		12760	4.18881
	12800	4.22988		12800	4.18797
	12840	4.21207		12840	4.18189
	12880	4.18912		12880	4.16754
	12920	4.1798		12920	4.15004
	12960	4.19227		12960	4.16597
	13000	4.24047		13000	4.18147
	13040	4.25136		13040	4.19908
	13080	4.23208		13080	4.20442
	13120	4.20275		13120	4.20327
	13160	4.20337		13160	4.18064
	13200	4.204		13200	4.17938
	13240	4.21197		13240	4.18975
	13280	4.22223		13280	4.18525
	13320	4.2302		13320	4.17246
	13360	4.22747		13360	4.16523
	13400	4.22978		13400	4.15937
	13440	4.23439		13440	4.16555
	13480	4.25901		13480	4.18064
	13520	4.28426		13520	4.17058
	13560	4.30847		13560	4.14218
	13600	4.31769		13600	4.12783
	13640	4.31276		13640	4.12909
	13680	4.28961		13680	4.14166
	13720	4.25555		13720	4.14281
	13760	4.2347		13760	4.15738
	13800	4.26718		13800	4.17404
	13840	4.2916		13840	4.1799
	13880	4.3049		13880	4.17142
	13920	4.30291		13920	4.16513
	13960	4.28531		13960	4.16261
	14000	4.28269		14000	4.17467
	14040	4.28133		14040	4.1711
	14080	4.26645		14080	4.17865
	14120	4.2369		14120	4.17362
	14160	4.22978		14160	4.17487
	14200	4.25409		14200	4.16901
	14240	4.27557		14240	4.14491
	14280	4.29715		14280	4.15298
	14320	4.29432		14320	4.16806
	14360	4.28332		14360	4.17131
	14400	4.28154		14400	4.17749
	14440	4.29223		14440	4.18451
	14480	4.28678		14480	4.18598
	14520	4.2828		14520	4.17728
	14560	4.28468		14560	4.16586
	14600	4.2894		14600	4.16911
	14640	4.29306		14640	4.17204
	14680	4.27777		14680	4.16398
	14720	4.26299		14720	4.15392
	14760	4.25859		14760	4.1469
	14800	4.26247		14800	4.1491
	14840	4.26917		14840	4.1425
	14880	4.28353		14880	4.13328
	14920	4.28856		14920	4.12919
	14960	4.29589		14960	4.12542
	15000	4.28301		15000	4.13202
	15040	4.27578		15040	4.12521
	15080	4.27001		15080	4.10813
	15120	4.26561		15120	4.10467
	15160	4.26708		15160	4.11945
	15200	4.27211		15200	4.14009
	15240	4.27567		15240	4.14355
	15280	4.2938		15280	4.12123
	15320	4.29369		15320	4.11976
	15360	4.32125		15360	4.12322
	15400	4.33759		15400	4.11945
	15440	4.32764		15440	4.11756
	15480	4.27557		15480	4.11976
	15520	4.21532		15520	4.1251
	15560	4.16733		15560	4.14145
	15600	4.17645		15600	4.14596
	15640	4.2106		15640	4.12814
	15680	4.25063		15680	4.09587
	15720	4.26687		15720	4.06947
	15760	4.25136		15760	4.07355
	15800	4.25608		15800	4.08089
	15840	4.27756		15840	4.08288
	15880	4.28269		15880	4.08634
	15920	4.26205		15920	4.07775
	15960	4.25115		15960	4.07712
	16000	4.26614		16000	4.07031
	16040	4.29516		16040	4.07754
	16080	4.30071		16080	4.07911
	16120	4.27955		16120	4.07397
	16160	4.25692		16160	4.08393
	16200	4.27106		16200	4.07942
	16240	4.29966		16240	4.07701
	16280	4.31465		16280	4.06601
	16320	4.28667		16320	4.06569
	16360	4.28468		16360	4.06884
	16400	4.29715		16400	4.06538
	16440	4.30784		16440	4.068
	16480	4.30166		16480	4.06161
	16520	4.30752		16520	4.07376
	16560	4.29516		16560	4.07754
	16600	4.27399		16600	4.07712
	16640	4.25251		16640	4.08204
	16680	4.21857		16680	4.07816
	16720	4.19049		16720	4.08361
	16760	4.17529		16760	4.09032
	16800	4.18368		16800	4.08026
	16840	4.19279		16840	4.0746
	16880	4.21626		16880	4.05899
	16920	4.27682		16920	4.05103
	16960	4.31234		16960	4.05082
	17000	4.31999		17000	4.0635
	17040	4.30972		17040	4.08099
	17080	4.30396		17080	4.10006
	17120	4.3026		17120	4.09357
	17160	4.2676		17160	4.06737
	17200	4.22066		17200	4.0131
	17240	4.17613		17240	3.99738
	17280	4.17163		17280	4.00461
	17320	4.22077		17320	4.00566
	17360	4.2719		17360	4.00597
	17400	4.31496		17400	4.01152
	17440	4.31098		17440	4.03238
	17480	4.30448		17480	4.04086
	17520	4.28552		17520	4.0395
	17560	4.25681		17560	4.02504
	17600	4.23837		17600	4.03573
	17640	4.25702		17640	4.04359
	17680	4.26792		17680	4.04673
	17720	4.25367		17720	4.04128
	17760	4.23271		17760	4.02525
	17800	4.23334		17800	4.03154
	17840	4.22496		17840	4.03018
	17880	4.23627		17880	4.04139
	17920	4.28007		17920	4.04401
	17960	4.30176		17960	4.03772
	18000	4.31056		18000	4.04086
	18040	4.29799		18040	4.04883
	18080	4.27997		18080	4.03772
	18120	4.25		18120	4.04694
	18160	4.22496		18160	4.05417
	18200	4.23166		18200	4.05763
	18240	4.24434		18240	4.05386
	18280	4.26425		18280	4.05679
	18320	4.28636		18320	4.0701
	18360	4.30228		18360	4.06999
	18400	4.31989		18400	4.06894
	18440	4.32492		18440	4.07093
	18480	4.32188		18480	4.07575
	18520	4.32198		18520	4.07659
	18560	4.3114		18560	4.08718
	18600	4.30145		18600	4.10373
	18640	4.28405		18640	4.09682
	18680	4.24392		18680	4.08539
	18720	4.23806		18720	4.05333
	18760	4.25985		18760	4.03552
	18800	4.29013		18800	4.03678
	18840	4.2961		18840	4.06538
	18880	4.29516		18880	4.0768
	18920	4.31538		18920	4.07167
	18960	4.34126		18960	4.07167
	19000	4.34		19000	4.08665
	19040	4.31622		19040	4.10467
	19080	4.29024		19080	4.114
	19120	4.29264		19120	4.1162
	19160	4.29893		19160	4.08801
	19200	4.29893		19200	4.07775
	19240	4.29516		19240	4.06779
	19280	4.28667		19280	4.05868
	19320	4.28877		19320	4.02693
	19360	4.27976		19360	4.00985
	19400	4.2807		19400	4.03646
	19440	4.28112		19440	4.07366
	19480	4.2786		19480	4.0856
	19520	4.27221		19520	4.07586
	19560	4.24476		19560	4.05281
	19600	4.22831		19600	4.02546
	19640	4.22684		19640	4.02284
	19680	4.25314		19680	4.04411
	19720	4.28636		19720	4.0679
	19760	4.27913		19760	4.09189
	19800	4.28185		19800	4.10205
	19840	4.27619		19840	4.11798
	19880	4.26226		19880	4.09461
	19920	4.23481		19920	4.06067
	19960	4.23984		19960	4.04422
	20000	4.2477		20000	4.03353
	20040	4.26593		20040	4.01907
	20080	4.28604		20080	4.01467
	20120	4.28248		20120	4.03206
	20160	4.26645		20160	4.05794
	20200	4.24843		20200	4.05679
	20240	4.25629		20240	4.01456
	20280	4.25671		20280	4.02609
	20320	4.24948		20320	4.01781
	20360	4.22705		20360	4.02619
	20400	4.22758		20400	4.03133
	20440	4.23512		20440	4.03887
	20480	4.25314		20480	4.03636
	20520	4.26635		20520	4.04013
	20560	4.27724		20560	4.03154
	20600	4.26435		20600	4.04484
	20640	4.26467		20640	4.0701
	20680	4.25911		20680	4.08057
	20720	4.25147		20720	4.09922
	20760	4.24895		20760	4.08707
	20800	4.26215		20800	4.06737
	20840	4.29107		20840	4.05249
	20880	4.31109		20880	4.05647
	20920	4.30773		20920	4.07502
	20960	4.28405		20960	4.0834
	21000	4.28059		21000	4.09503
	21040	4.27923		21040	4.09556
	21080	4.27965		21080	4.09912
	21120	4.26729		21120	4.09252
	21160	4.26593		21160	4.08057
	21200	4.26645		21200	4.06507
	21240	4.26865		21240	4.03531
	21280	4.25692		21280	4.03835
	21320	4.24853		21320	4.0658
	21360	4.24759		21360	4.0942
	21400	4.25241		21400	4.10939
	21440	4.2675		21440	4.11222
	21480	4.27997		21480	4.09839
	21520	4.2828		21520	4.09765
	21560	4.25388		21560	4.09587
	21600	4.21134		21600	4.09933
	21640	4.20233		21640	4.10027
	21680	4.22108		21680	4.1008
	21720	4.22716		21720	4.10624
	21760	4.22464		21760	4.10677
	21800	4.24308		21800	4.10048
	21840	4.26802		21840	4.10488
	21880	4.28468		21880	4.12709
	21920	4.28992		21920	4.15696
	21960	4.26132		21960	4.17005
	22000	4.239		22000	4.1645
	22040	4.22297		22040	4.13432
	22080	4.21155		22080	4.11882
	22120	4.2215		22120	4.136
	22160	4.22161		22160	4.13432
	22200	4.2479		22200	4.10541
	22240	4.2916		22240	4.05773
	22280	4.32555		22280	4.06339
	22320	4.32492		22320	4.1207
	22360	4.29065		22360	4.1535
	22400	4.24319		22400	4.16639
	22440	4.22454		22440	4.15413
	22480	4.23145		22480	4.13181
	22520	4.2499		22520	4.12531
	22560	4.27756		22560	4.12919
	22600	4.28604		22600	4.12961
	22640	4.26645		22640	4.13474
	22680	4.23313		22680	4.13422
	22720	4.21375		22720	4.09598
	22760	4.23125		22760	4.0833
	22800	4.26037		22800	4.09315
	22840	4.29558		22840	4.12657
	22880	4.31737		22880	4.11515
	22920	4.30574		22920	4.11808
	22960	4.26362		22960	4.12186
	23000	4.25367		23000	4.12144
	23040	4.25335		23040	4.11295
	23080	4.20882		23080	4.11347
	23120	4.14637		23120	4.11578
	23160	4.15046		23160	4.10823
	23200	4.20442		23200	4.10153
	23240	4.2258		23240	4.10572
	23280	4.21846		23280	4.1227
	23320	4.23638		23320	4.12846
	23360	4.2653		23360	4.10624
	23400	4.28542		23400	4.08864
	23440	4.26802		23440	4.07796
	23480	4.27012		23480	4.09556
	23520	4.27022		23520	4.08508
	23560	4.25		23560	4.02955
	23600	4.2368		23600	4.00513
	23640	4.20924		23640	3.9868
	23680	4.21113		23680	4.01718
	23720	4.22401		23720	4.04652
	23760	4.23816		23760	4.07638
	23800	4.28269		23800	4.10258
	23840	4.31936		23840	4.07219
	23880	4.32691		23880	4.00744
	23920	4.31915		23920	4.0022
	23960	4.29055		23960	4.05155
	24000	4.2587		24000	4.07691
	24040	4.23219		24040	4.08498
	24080	4.21857		24080	4.10593
	24120	4.23931		24120	4.11798
	24160	4.27986		24160	4.13453
	24200	4.29275		24200	4.13894
	24240	4.28845		24240	4.12772
	24280	4.29024		24280	4.11452
	24320	4.28059		24320	4.11987
	24360	4.25		24360	4.13642
	24400	4.23931		24400	4.14512
	24440	4.24916		24440	4.13757
	24480	4.26362		24480	4.13956
	24520	4.2654		24520	4.13254
	24560	4.25126		24560	4.09126
	24600	4.23428		24600	4.08655
	24640	4.22716		24640	4.09964
	24680	4.23334		24680	4.08655
	24720	4.22108		24720	4.06475
	24760	4.22318		24760	4.05522
	24800	4.21458		24800	4.06067
	24840	4.23512		24840	4.05993
	24880	4.27337		24880	4.05071
	24920	4.29086		24920	4.04977
	24960	4.28405		24960	4.03227
	25000	4.24675		25000	4.03122
	25040	4.20914		25040	4.06035
	25080	4.19929		25080	4.07816
	25120	4.23397		25120	4.09126
	25160	4.23942		25160	4.10981
	25200	4.24518		25200	4.13013
	25240	4.24948		25240	4.11693
	25280	4.2523		25280	4.06234
	25320	4.24874		25320	4.04024
	25360	4.25555		25360	4.05176
	25400	4.26823		25400	4.06067
	25440	4.29589		25440	4.06276
	25480	4.28604		25480	4.07324
	25520	4.25587		25520	4.0988
	25560	4.2106		25560	4.10551
	25600	4.18011		25600	4.11012
	25640	4.16377		25640	4.08309
	25680	4.16544		25680	4.04338
	25720	4.20023		25720	4.03877
	25760	4.22412		25760	4.05323
	25800	4.25262		25800	4.05585
	25840	4.27913		25840	4.03573
	25880	4.25733		25880	4.02567
	25920	4.21668		25920	4.04254
	25960	4.21867		25960	4.0593
	26000	4.25136		26000	4.05721
	26040	4.27881		26040	4.05396
	26080	4.27525		26080	4.07638
	26120	4.27829		26120	4.1141
	26160	4.26697		26160	4.13307
	26200	4.22737		26200	4.10384
	26240	4.21658		26240	4.07974
	26280	4.23701		26280	4.08141
	26320	4.23743		26320	4.09964
	26360	4.22674		26360	4.09116
	26400	4.20851		26400	4.06255
	26440	4.19845		26440	4.06559
	26480	4.21595		26480	4.10132
	26520	4.23418		26520	4.10782
	26560	4.23868		26560	4.0987
	26600	4.24319		26600	4.07345
	26640	4.24371		26640	4.07512
	26680	4.25126		26680	4.0746
	26720	4.25105		26720	4.0548
	26760	4.24047		26760	4.06559
	26800	4.25031		26800	4.08099
	26840	4.25189		26840	4.08581
	26880	4.28803		26880	4.06329
	26920	4.30291		26920	4.04275
	26960	4.29987		26960	4.04223
	27000	4.26341		27000	4.04348
	27040	4.21857		27040	4.03091
	27080	4.20547		27080	4.06287
	27120	4.22119		27120	4.11148
	27160	4.24172		27160	4.12709
	27200	4.24455		27200	4.09545
	27240	4.24738		27240	4.08403
	27280	4.26938		27280	4.09954
	27320	4.29851		27320	4.08759
	27360	4.2851		27360	4.06936
	27400	4.23135		27400	4.04935
	27440	4.19059		27440	4.03164
	27480	4.17666		27480	4.01729
	27520	4.18347		27520	4.03353
	27560	4.18326		27560	4.08246
	27600	4.20013		27600	4.12772
	27640	4.22339		27640	4.1207
	27680	4.23198		27680	4.11274
	27720	4.23198		27720	4.11127
	27760	4.24885		27760	4.10551
	27800	4.25629		27800	4.08759
	27840	4.25964		27840	4.07492
	27880	4.24109		27880	4.07775
	27920	4.23303		27920	4.07607
	27960	4.21899		27960	4.08256
	28000	4.20851		28000	4.07796
	28040	4.23041		28040	4.05784
	28080	4.27818		28080	4.03238
	28120	4.28793		28120	4.01226
	28160	4.25084		28160	4.03583
	28200	4.17896		28200	4.08477
	28240	4.14763		28240	4.08477
	28280	4.16094		28280	4.03426
	28320	4.17026		28320	3.96574
	28360	4.17131		28360	3.98732
	28400	4.17592		28400	4.06486
	28440	4.18996		28440	4.08309
	28480	4.23334		28480	4.02515
	28520	4.26132		28520	3.98627
	28560	4.26729		28560	4.00472
	28600	4.25545		28600	4.0394
	28640	4.25597		28640	4.0724
	28680	4.26614		28680	4.0615
	28720	4.22014		28720	4.03248
	28760	4.15559		28760	4.02064
	28800	4.13852		28800	4.04369
	28840	4.17844		28840	4.07125
	28880	4.23135		28880	4.08613
	28920	4.25629		28920	4.09493
	28960	4.25618		28960	4.11819
	29000	4.26603		29000	4.11306
	29040	4.26456		29040	4.10163
	29080	4.23921		29080	4.10604
	29120	4.2325		29120	4.11347
	29160	4.23344		29160	4.10205
	29200	4.24099		29200	4.07031
	29240	4.22161		29240	4.05941
	29280	4.20096		29280	4.07596
	29320	4.204		29320	4.09671
	29360	4.24707		29360	4.10111
	29400	4.28835		29400	4.11085
	29440	4.27756		29440	4.09839
	29480	4.24434		29480	4.10352
	29520	4.22779		29520	4.1008
	29560	4.24015		29560	4.0987
	29600	4.24382		29600	4.08036
	29640	4.23376		29640	4.06486
	29680	4.24497		29680	4.07481
	29720	4.27158		29720	4.07492
	29760	4.27462		29760	4.09315
	29800	4.26404		29800	4.10708
	29840	4.25922		29840	4.10981
	29880	4.28961		29880	4.11588
	29920	4.31538		29920	4.11557
	29960	4.31496		29960	4.10363
	30000	4.27263		30000	4.09199
	30040	4.23764		30040	4.09797
	30080	4.22066		30080	4.10142
	30120	4.21186		30120	4.07848
	30160	4.22831		30160	4.057
	30200	4.239		30200	4.06821
	30240	4.22621		30240	4.08361
	30280	4.18389		30280	4.08539
	30320	4.15643		30320	4.06318
	30360	4.13652		30360	4.06224
	30400	4.14187		30400	4.07785
	30440	4.14858		30440	4.08173
	30480	4.15549		30480	4.08277
	30520	4.17749		30520	4.07114
	30560	4.18504		30560	4.05899
	30600	4.19625		30600	4.05228
	30640	4.20568		30640	4.07366
	30680	4.19594		30680	4.1206
	30720	4.17728		30720	4.13799
	30760	4.16859		30760	4.14564
	30800	4.18263		30800	4.12552
	30840	4.23104		30840	4.08592
	30880	4.27085		30880	4.07355
	30920	4.27682		30920	4.07052
	30960	4.23858		30960	4.0701
	31000	4.19384		31000	4.07135
	31040	4.18326		31040	4.04464
	31080	4.16765		31080	4.03908
	31120	4.17404		31120	4.05386
	31160	4.17131		31160	4.11023
	31200	4.16744		31200	4.14941
	31240	4.15633		31240	4.10907
	31280	4.1447		31280	4.06098
	31320	4.12846		31320	4.02567
	31360	4.14375		31360	4.03059
	31400	4.17791		31400	4.0768
	31440	4.22213		31440	4.09671
	31480	4.23208		31480	4.08099
	31520	4.23449		31520	4.03709
	31560	4.24329		31560	4.01645
	31600	4.22852		31600	4.01656
	31640	4.20746		31640	4.06769
	31680	4.1645		31680	4.13055
	31720	4.16565		31720	4.12008
	31760	4.20117		31760	4.04851
	31800	4.21039		31800	3.99948
	31840	4.23135		31840	4.02012
	31880	4.26247		31880	4.09084
	31920	4.26875		31920	4.14847
	31960	4.25042		31960	4.10635
	32000	4.22401		32000	4.05124
	32040	4.19614		32040	4.04579
	32080	4.20013		32080	4.09231
	32120	4.22988		32120	4.0811
	32160	4.22286		32160	4.00744
	32200	4.21406		32200	3.96794
	32240	4.24319		32240	4.01152
	32280	4.23083		32280	4.10122
	32320	4.21218		32320	4.14187
	32360	4.2017		32360	4.11127
	32400	4.19311		32400	4.06119
	32440	4.1821		32440	4.06119
	32480	4.18409		32480	4.10509
	32520	4.18996		32520	4.10289
	32560	4.18179		32560	4.05836
	32600	4.17645		32600	3.99403
	32640	4.16733		32640	3.95296
	32680	4.14941		32680	3.97307
	32720	4.14554		32720	3.98418
	32760	4.18137		32760	3.99654
	32800	4.23889		32800	4.00052
	32840	4.27054		32840	4.00482
	32880	4.27724		32880	4.00702
	32920	4.29149		32920	4.0197
	32960	4.28049		32960	4.04254
	33000	4.25723		33000	4.05323
	33040	4.22297		33040	4.06664
	33080	4.1666		33080	4.08162
	33120	4.14952		33120	4.11452
	33160	4.16785		33160	4.13087
	33200	4.19803		33200	4.10687
	33240	4.2039		33240	4.05155
	33280	4.1733		33280	4.02347
	33320	4.14355		33320	4.00786
	33360	4.19447		33360	3.99088
	33400	4.25964		33400	3.98889
	33440	4.26561		33440	4.02211
	33480	4.24036		33480	4.05312
	33520	4.17215		33520	4.07219
	33560	4.13076		33560	4.07052
	33600	4.12751		33600	4.04474
	33640	4.13757		33640	4.03269
	33680	4.1601		33680	4.04044
	33720	4.16974		33720	4.01959
	33760	4.16408		33760	3.9824
	33800	4.18147		33800	4.0176
	33840	4.20442		33840	4.07481
	33880	4.19635		33880	4.05166
	33920	4.16922		33920	3.98177
	33960	4.16964		33960	3.94185
	34000	4.20851		34000	3.93891
	34040	4.20117		34040	3.95159
	34080	4.15685		34080	3.96962
	34120	4.11201		34120	4.02735
	34160	4.09598		34160	4.07628
	34200	4.11096		34200	4.08455
	34240	4.15402		34240	4.05469
	34280	4.20191		34280	3.95107
	34320	4.21469		34320	3.89732
	34360	4.19594		34360	3.92487
	34400	4.1952		34400	4.00136
	34440	4.20872		34440	4.0549
	34480	4.23125		34480	4.06549
	34520	4.23575		34520	4.06832
	34560	4.2347		34560	4.06978
	34600	4.23229		34600	4.04401
	34640	4.20777		34640	4.01635
	34680	4.18116		34680	4.02955
	34720	4.14952		34720	4.04872
	34760	4.11285		34760	4.04579
	34800	4.11044		34800	4.01729
	34840	4.11148		34840	3.97695
	34880	4.11306		34880	3.95023
	34920	4.12741		34920	3.95547
	34960	4.14208		34960	3.99874
	35000	4.20075		35000	4.04411
	35040	4.24246		35040	4.0461
	35080	4.24078		35080	4.04107
	35120	4.21218		35120	4.06454
	35160	4.20809		35160	4.06391
	35200	4.23648		35200	4.00262
	35240	4.23166		35240	3.93137
	35280	4.19552		35280	3.92687
	35320	4.16513		35320	3.97863
	35360	4.1601		35360	4.05951
	35400	4.15612		35400	4.11096
	35440	4.14973		35440	4.10279
	35480	4.13579		35480	4.05113
	35520	4.14365		35520	4.02839
	35560	4.18525		35560	4.0242
	35600	4.20337		35600	4.04704
	35640	4.21637		35640	4.07345
	35680	4.23229		35680	4.08927
	35720	4.25859		35720	4.07953
	35760	4.23701		35760	4.03981
	35800	4.17739		35800	4.02358
	35840	4.14858		35840	4.01949
	35880	4.17194		35880	4.02902
	35920	4.18043		35920	4.04788
	35960	4.16869		35960	4.09702
	36000	4.11976		36000	4.12018
	36040	4.09985		36040	4.06423
	36080	4.1227		36080	3.98082
	36120	4.17875		36120	3.98135
	36160	4.22307		36160	4.04725
	36200	4.23407		36200	4.08728
	36240	4.20316		36240	4.07879
	36280	4.17875		36280	4.0899
	36320	4.1907		36320	4.10855
	36360	4.18598		36360	4.10184
	36400	4.19017		36400	4.10101
	36440	4.17561		36440	4.07533
	36480	4.18378		36480	4.01802
	36520	4.21595		36520	3.95725
	36560	4.22726		36560	3.91681
	36600	4.20264		36600	3.93588
	36640	4.17236		36640	4.0088
	36680	4.14386		36680	4.07712
	36720	4.12196		36720	4.12133
	36760	4.10719		36760	4.12196
	36800	4.11222		36800	4.10258
	36840	4.14019		36840	4.06538
	36880	4.15413		36880	3.98973
	36920	4.15413		36920	3.95264
	36960	4.15413		36960	3.97559
	37000	4.19688		37000	4.02148
	37040	4.23827		37040	4.06507
	37080	4.25052		37080	4.08414
	37120	4.26446		37120	4.05291
	37160	4.30082		37160	3.99801
	37200	4.31894		37200	3.97842
	37240	4.28688		37240	3.99539
	37280	4.22978		37280	4.01551
	37320	4.20222		37320	4.05522
	37360	4.24078		37360	4.10415
	37400	4.3464		37400	4.10698
	37440	4.43483		37440	4.0767
	37480	4.55386		37480	4.07261
	37520	4.88254		37520	4.05889
	37560	5.13799		37560	3.99507
	37600	4.69206		37600	3.96647
	37640	3.74906		37640	4.00335
	37680	2.38873		37680	4.06444
	37720	1.16859		37720	4.11966
	37760	0.55511		37760	4.12793
	37800	0.28437		37800	4.12018
	37840	0.1425		37840	4.09042
	37880	0.07251		37880	4.02389
	37920	0.04589		37920	3.96469
	37960	0.03405		37960	3.95442
	38000	0.02808		38000	4.01205
	38040	0.02305		38040	4.10823
	38080	0.00723		38080	4.17498
	38120	0.01687		38120	4.17666
	38160	0.01676		38160	4.11819
	38200	0.01404		38200	4.04107
	38240	0.01278		38240	3.98533
	38280	0.01163		38280	3.95589
	38320	0.00786		38320	3.96018
	38360	0.01257		38360	4.00262
	38400	0.00849		38400	4.05375
	38440	0.00859		38440	4.08393
	38480	0.00482		38480	4.08854
	38520	0.00451		38520	4.08812
	38560	0.00608		38560	4.08539
	38600	0.00671		38600	4.05679
	38640	0.00744		38640	4.04286
	38680	0.00692		38680	4.05658
	38720	0.0065		38720	4.08518
	38760	0.00335		38760	4.10687
	38800	0.00618		38800	4.10415
	38840	0.00964		38840	4.103
	38880	0.00618		38880	4.12846
	38920	0.00692		38920	4.14407
	38960	0.00639		38960	4.11693
	39000	0.00639		39000	4.05312
	39040	0.00796		39040	4.04338
	39080	0.00775		39080	4.07764
	39120	0.00964		39120	4.10331
	39160	0.011		39160	4.11829
	39200	0.01278		39200	4.16723
	39240	0.01331		39240	4.21521
	39280	0.01697		39280	4.10363
	39320	0.01718		39320	3.77326
	39360	0.02284		39360	3.42047
	39400	0.02798		39400	3.1294
	39440	0.03384		39440	2.93242
	39480	0.03992		39480	2.77441
	39520	0.0461		39520	2.64837
	39560	0.0548		39560	2.54946
	39600	0.06381		39600	2.48743
	39640	0.08267		39640	2.42718
	39680	0.09577		39680	2.23806
	39720	0.11316		39720	1.88454
	39760	0.13192		39760	1.40979
	39800	0.15779		39800	0.84577
	39840	0.18221		39840	0.40664
	39880	0.21081		39880	0.18242
	39920	0.24487		39920	0.07261
	39960	0.28699		39960	0.03604
	40000	0.32156		40000	0.02672
	40040	0.37678		40040	0.02148
	40080	0.44457		40080	0.02064
	40120	0.52798		40120	0.01645
	40160	0.62584		40160	0.01132
	40200	0.73365		40200	0.01436
	40240	0.83707		40240	0.01006
	40280	0.94332		40280	0.01058
	40320	1.02777		40320	0.01153
	40360	1.09367		40360	0.00775
	40400	1.11473		40400	0.01226
	40440	1.09964		40440	0.00744
	40480	1.06611		40480	0.00964
	40520	1.01907		40520	0.00859
	40560	0.96511		40560	0.00943
	40600	0.90088		40600	0.00838
	40640	0.8334		40640	0.00786
	40680	0.78783		40680	0.0087
	40720	0.78657		40720	0.00933
	40760	0.83571		40760	0.01048
	40800	0.91188		40800	0.00891
	40840	1.01446		40840	0.01069
	40880	1.16513		40880	0.01174
	40920	1.41167		40920	0.01132
	40960	1.7895		40960	0.01572
				41000	0.01352
				41040	0.01425
				41080	0.01456
				41120	0.0175
				41160	0.01708
				41200	0.02033
				41240	0.02347
				41280	0.02462
				41320	0.02829
				41360	0.03311
				41400	0.02808
				41440	0.0373
				41480	0.04034
				41520	0.04778
				41560	0.05019
				41600	0.0614
				41640	0.06915
				41680	0.07932
				41720	0.08739
				41760	0.10614
				41800	0.11704
				41840	0.14355
				41880	0.16901
				41920	0.19918
				41960	0.23449
				42000	0.2675
				42040	0.30092
				42080	0.34503
				42120	0.39941
				42160	0.45861
				42200	0.51938
				42240	0.57963
				42280	0.61934
				42320	0.67833
				42360	0.69227
				42400	0.72936
				42440	0.73208
				42480	0.73072
				42520	0.7258
				42560	0.70348
				42600	0.68797
				42640	0.67676
				42680	0.65077
				42720	0.65245
				42760	0.63108
				42800	0.64512
				42840	0.64386
				42880	0.67414
				42920	0.74424
				42960	0.85897
				43000	1.03877
