# Supplementary material for: Effect of the Freeze-Thaw on the Suspension Stability and Thermal Conductivity of EG/Water-Based Al2O3Nanofluids
Source: Hindawi journal article supplement (doi:10.1155/2019/2076341), 2019-02-12
Supplement: f3 [file 2076341.f3.xlsx]

## Sheet: Sheet1
Figure 6. TSI values of two types of EG/water-based Al2O3 nanofluids with elapsed time
		Measured by Turbiscan
		Without freeze-thaw			With freeze-thaw
		Time [hours]	Turbiscan Stability Index [%]		Time [hours]	Turbiscan Stability Index [%]
		0	0		0	0
		1	0.03442		1	0.01879
		2	0.07028		2	0.03837
		3	0.10685		3	0.05839
		4	0.14342		4	0.07853
		5	0.17927		5	0.09845
		6	0.21369		6	0.1178
		7	0.24597		7	0.13625
		8	0.27538		8	0.15346
		9	0.30122		9	0.16909
		10	0.32378		10	0.18279
		11	0.34403		11	0.19465
		12	0.36222		12	0.20507
		13	0.3786		13	0.21422
		14	0.39344		14	0.22228
		15	0.40699		15	0.22942
		16	0.41951		16	0.23581
		17	0.43125		17	0.24162
		18	0.44249		18	0.24703
		19	0.45346		19	0.25221
		20	0.46443		20	0.25733
		21	0.47566		21	0.26256
		22	0.48741		22	0.26809
		23	0.49993		23	0.27408
		24	0.51348		24	0.28069
