# Supplementary material for: Effect of the Freeze-Thaw on the Suspension Stability and Thermal Conductivity of EG/Water-Based Al2O3Nanofluids
Source: Hindawi journal article supplement (doi:10.1155/2019/2076341), 2019-02-12
Supplement: f4 [file 2076341.f4.xlsx]

## Sheet: Sheet1
Figure 7. PSA results of two types of EG/water-based Al2O3 nanofluids
		Measured by Particle Size Analyzer
		Without freeze-thaw			With freeze-thaw
		Diameter [nm]	Volume [%]		Diameter [nm]	Volume [%]
		11	0		11	0
		13	0		13	0
		15	0		15	0
		17	0		17	0
		20	0		20	0
		23	0		23	0
		26	0		26	0
		30	0		30	0
		34	0		34	0
		39	0		39	0
		44	0.624		44	0.607
		51	2.152		51	2.068
		58	9.756		58	9.251
		67	33.258		67	31.714
		76	41.53		76	41.706
		87	12.061		87	13.76
		100	0.62		100	0.895
		115	0		115	0
		131	0		131	0
		150	0		150	0
		172	0		172	0
		197	0		197	0
		226	0		226	0
		259	0		259	0
		296	0		296	0
