# Supplementary material for: Effect of the Freeze-Thaw on the Suspension Stability and Thermal Conductivity of EG/Water-Based Al2O3Nanofluids
Source: Hindawi journal article supplement (doi:10.1155/2019/2076341), 2019-02-12
Supplement: f5 [file 2076341.f5.xlsx]

## Sheet: Sheet1
		Figure 9. Thermal conductivity of two types of EG/water-based Al2O3 nanofluids
		Measured by Transient Hot Wire System
		Without freeze-thaw				With freeze-thaw
		Temperature [℃]	Thermal conductivity [W/mK]	Uncertainty [W/mK]		Temperature [℃]	Thermal conductivity [W/mK]	Uncertainty [W/mK]
		-9.6	0.37252	0.00373		-9.4	0.37229	0.00372
		0	0.37958	0.0038		0	0.37908	0.00379
		10.5	0.38832	0.00388		10	0.38802	0.00388
		20.6	0.39452	0.00395		19.5	0.39549	0.00395
		30.4	0.40098	0.00401		30	0.40059	0.00401
		40.6	0.40962	0.0041		39.9	0.40743	0.00407
		50.6	0.41633	0.00416		50	0.41549	0.00415
		60.7	0.42227	0.00422		59.9	0.4233	0.00423
		69.5	0.43012	0.0043		70	0.43013	0.0043
